# Supplementary material for: Projected impact of HPV vaccination and primary HPV screening on cervical adenocarcinoma: Example from Australia
Source: PubMed Central journal article supplement — Papillomavirus Res. 2017 Apr 19;3:134–41. doi: 10.1016/j.pvr.2017.04.003 (PMC5883242; doi:10.1016/j.pvr.2017.04.003), 2017-04-19
Supplement: mmc1.pdf [file mmc1.pdf]

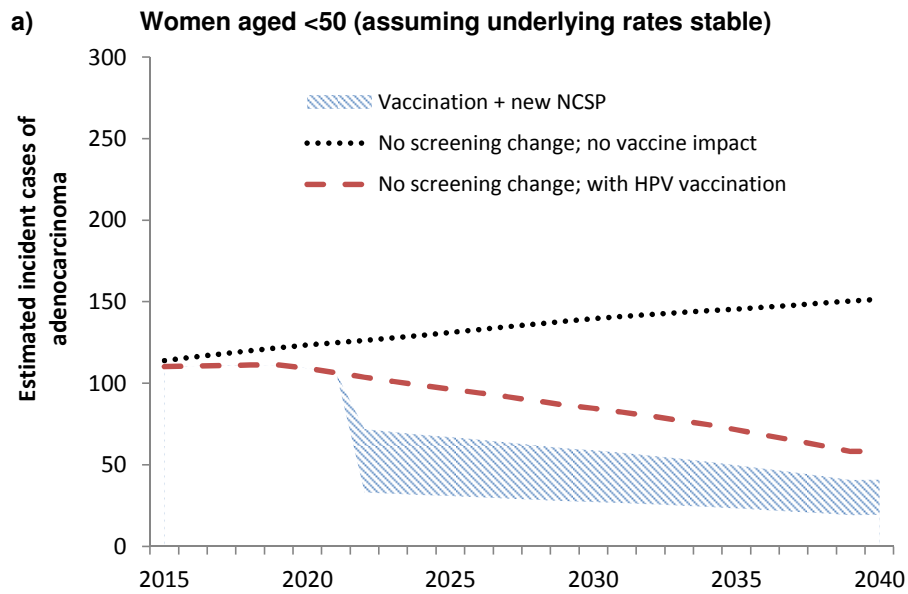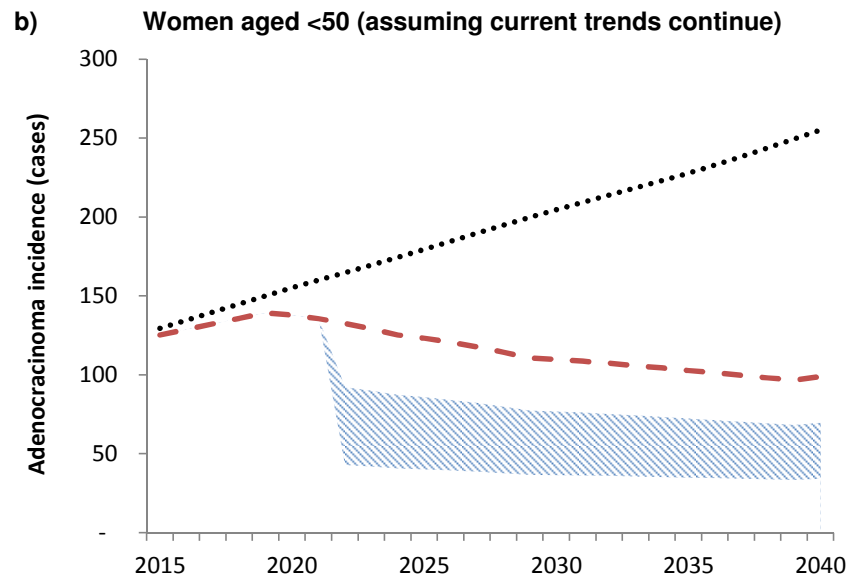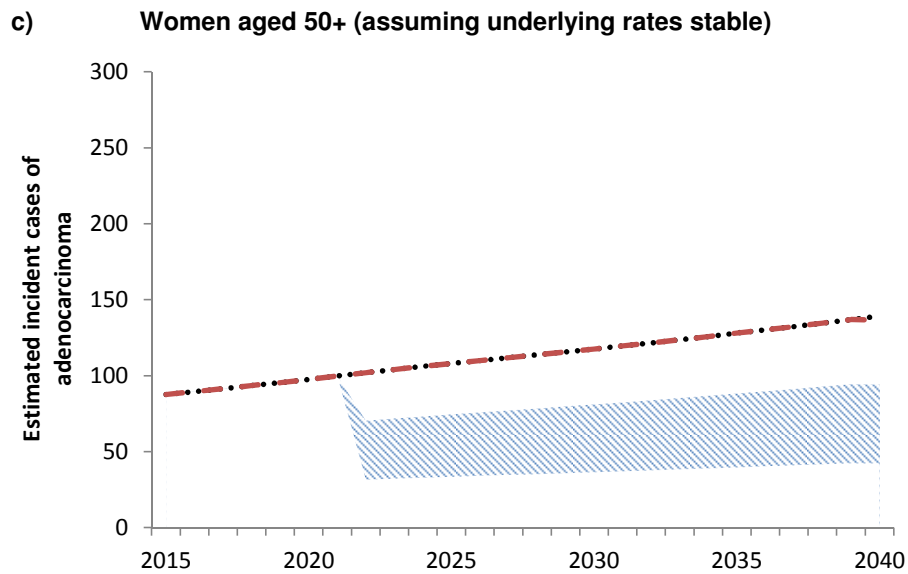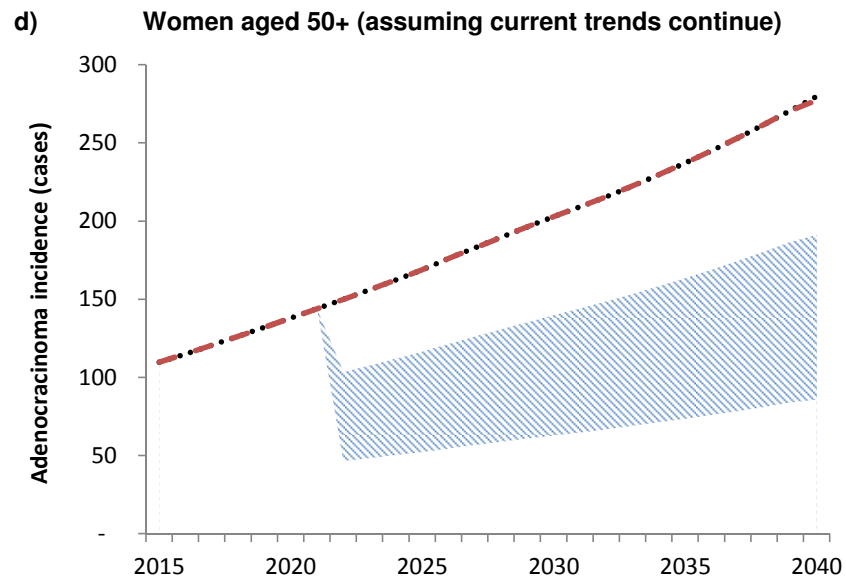

Shaded area represents the range of predictions, taking into account uncertainties in the effectiveness of HPV-based screening in preventing adenocarcinoma.<sup>14</sup>
