# Supplementary material for: Projected impact of HPV vaccination and primary HPV screening on cervical adenocarcinoma: Example from Australia
Source: PubMed Central journal article supplement — Papillomavirus Res. 2017 Apr 19;3:134–41. doi: 10.1016/j.pvr.2017.04.003 (PMC5883242; doi:10.1016/j.pvr.2017.04.003), 2017-04-19
Supplement: mmc2.pdf [file mmc2.pdf]

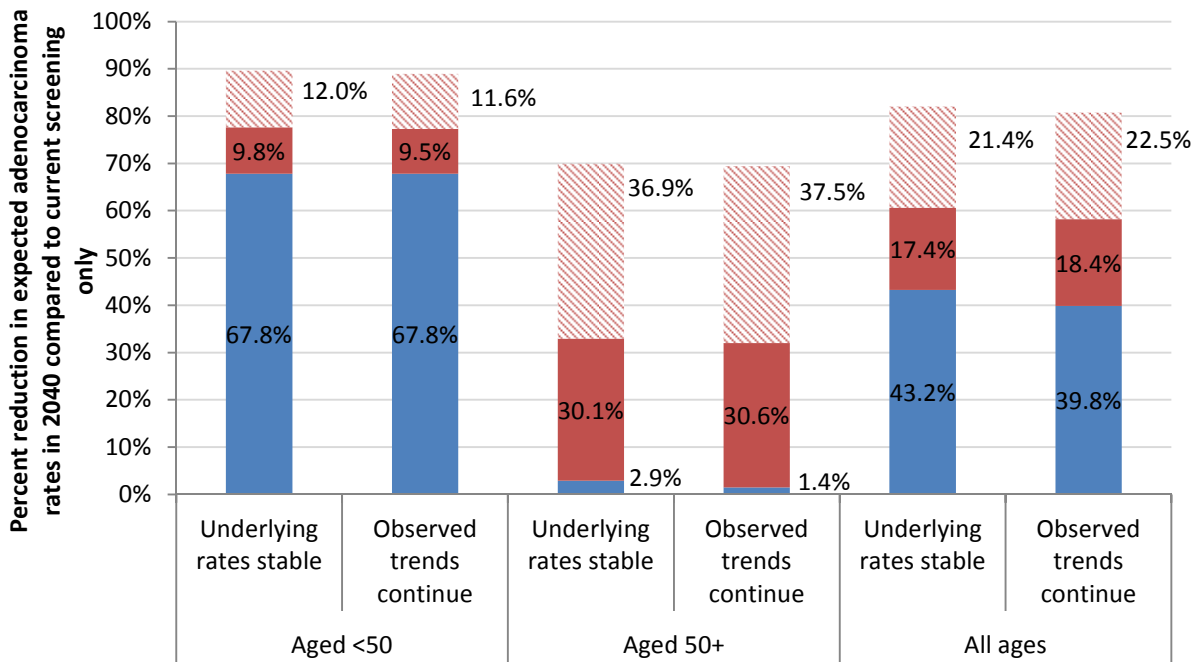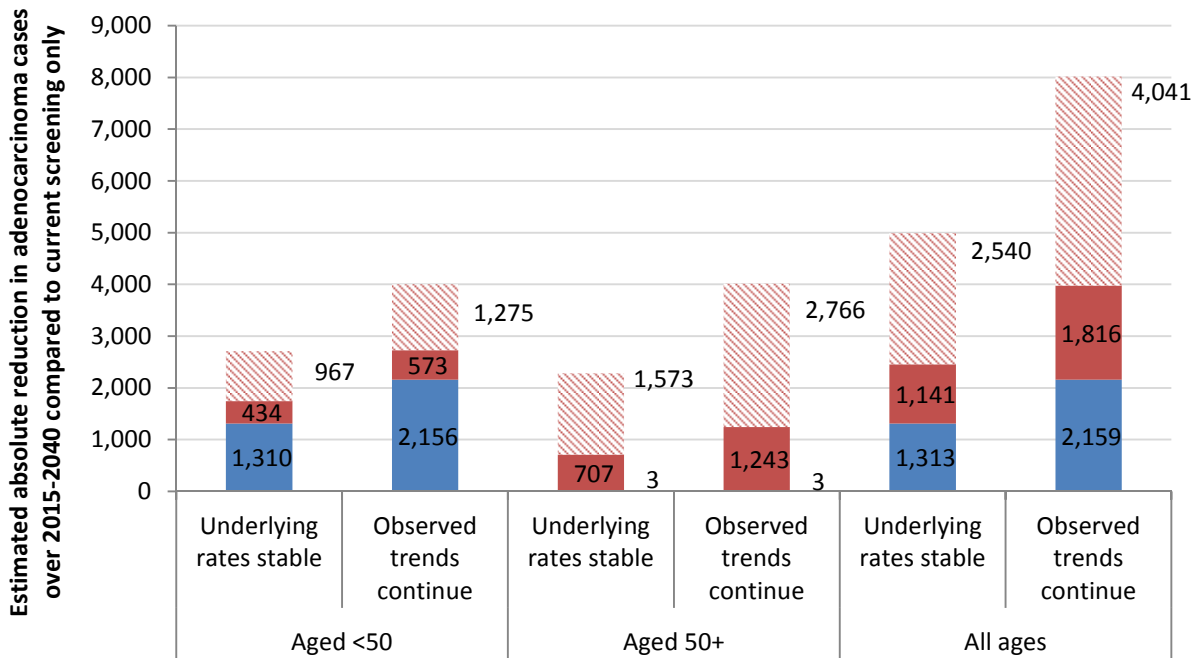

- ▨ Additional reduction due to HPV-based screening (higher impact)
- Additional reduction due to HPV-based screening (lower impact)
- Reduction due to HPV vaccination
